# Supplementary material for: Preparation, Characterization and Study of the Dissociation of Naproxen from Its Chitosan Salt
Source: MDPI journal article supplement (doi:10.3390/molecules27185801), 2022-09-07
Supplement: s1 [file s1]

# PREPARATION, CHARACTERIZATION AND STUDY OF THE DISSOCIATION OF NAPROXEN FROM ITS CHITOSAN SALTS

Ricardo S. Medeiros<sup>1</sup>, Ana P.G. Ferreira<sup>1</sup>, Tiago Venâncio<sup>2</sup>, Éder T.G. Cavalheiro<sup>1\*</sup>

## Supplementary materials

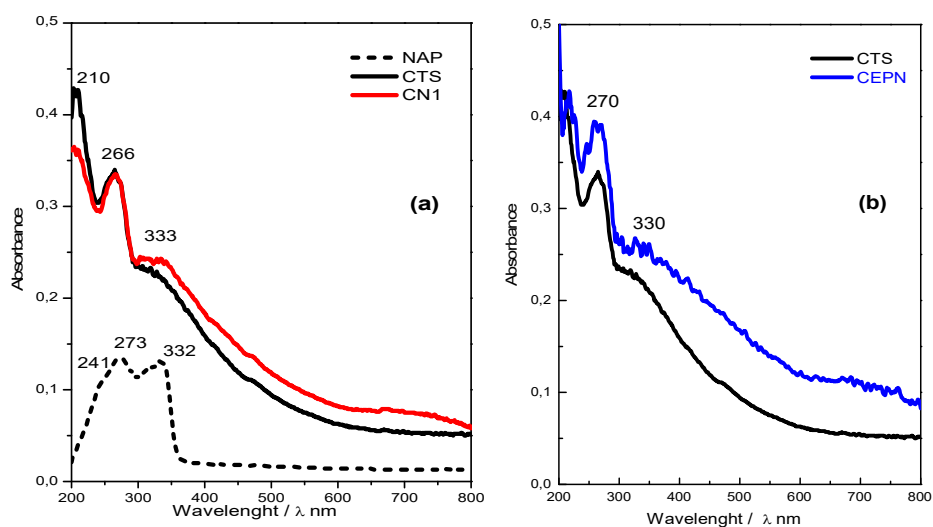

**Figure S1.** UV-vis diffuse reflectance spectroscopy spectra of NAP, CTS, CN1 (a) and CTS, CEPN (b) obtained in the diffuse reflectance mode.

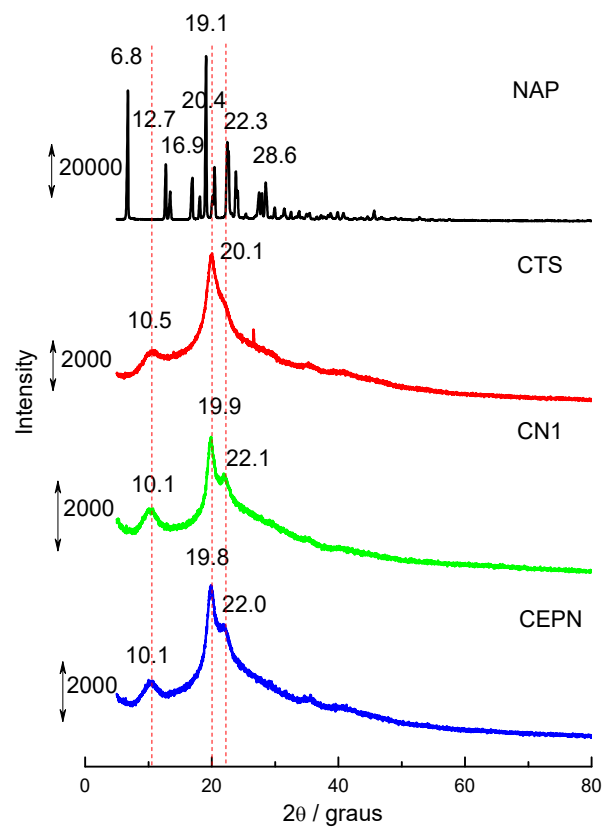

**Figure S2.** Diffractograms of NAP, CTS, CN1 and CEPN.

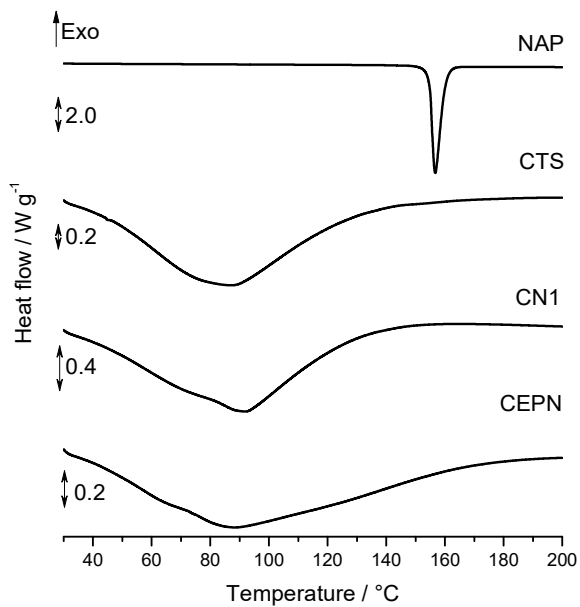

**Figure S3.** DSC curves of NAP, CTS, CN1 and CEPN in  $N_2$  atmosphere flowing  $50 \text{ mL min}^{-1}$ , sample mass of  $4.0 \pm 0.1 \text{ mg}$ , in aluminum sample holder with a central pin hole in the lid and heating rate of  $10 \text{ }^\circ\text{C min}^{-1}$ .

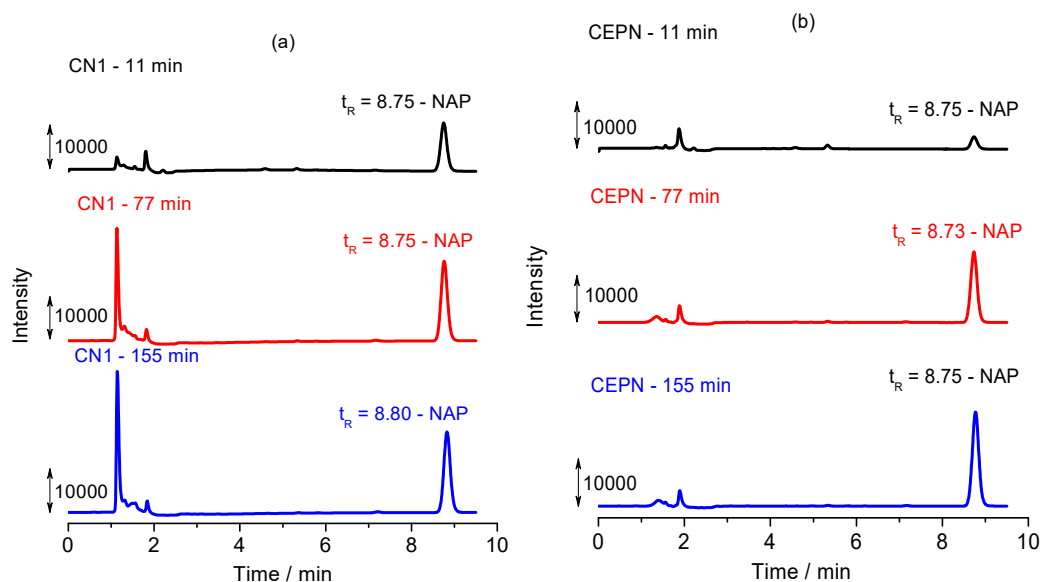

**Figure S4.** Chromatograms of CN1 (a) and CEPN (b) aliquots taken at different times at pH 2.00

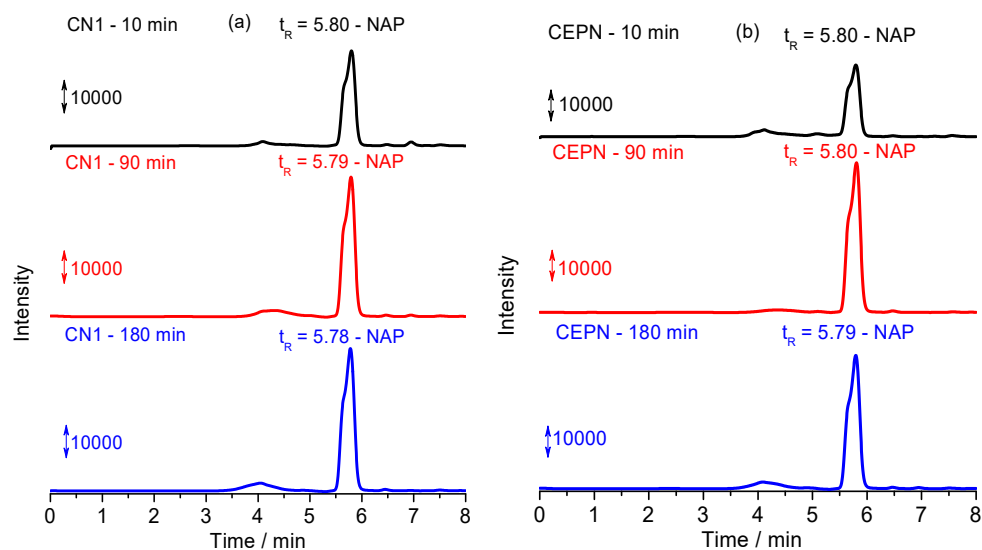

**Figure S5.** Chromatograms of CN1 (a) and CEPN (b) aliquots taken at different times at pH 7.00

**Table S1.** Parameters of the linear analytical curves obtained by HPLC for NAP at pH 2.00 and 7.00

| Medium  | Intercept /<br>$10^3$ | Sensitivity /<br>$10^9 \mu\text{mol L}^{-1}$ | Linear region /<br>$\mu\text{mol L}^{-1}$ | Correlation<br>coefficient, $R^2$ |
|---------|-----------------------|----------------------------------------------|-------------------------------------------|-----------------------------------|
| pH 2.00 | 7.26                  | 3.22                                         | 2.50-75.0                                 | 0.995                             |
| pH 7.00 | 25.5                  | 12.8                                         | 1.00-125.0                                | 0.998                             |
